# Supplementary material for: Expansion microscopy of C. elegans
Source: eLife. 2020 May 1;9:e46249. doi: 10.7554/eLife.46249 (PMC7195193; doi:10.7554/eLife.46249)
Supplement: Figure 6—source data 2. [file elife-46249-fig6-data2.xlsx]

## Sheet: Sheet1
Profile index	Peak counts
	Pre-ExCel	Post-ExCel
1	24	54
2	13	34
3	11	30
4	15	28
5	12	23
6	11	24
7	19	34
8	15	30
9	16	47
10	31	68
11	15	28
12	16	25
13	10	21
14	14	26
15	17	28
16	11	18
