# Supplementary material for: Expansion microscopy of C. elegans
Source: eLife. 2020 May 1;9:e46249. doi: 10.7554/eLife.46249 (PMC7195193; doi:10.7554/eLife.46249)
Supplement: Figure 10—source data 1. [file elife-46249-fig10-data1.xlsx]

## Sheet: Aggregated raw data
Target	Strain	Animal index	Neuron identity	mRNA count
unc-25	CX16682	1	RIS	146
unc-25	CX16682	1	DD1	130
unc-25	CX16682	1	VD1	96
unc-25	CX16682	1	VD2	61
unc-25	CX16682	2	RMEV	51
unc-25	CX16682	2	RMED	54
unc-25	CX16682	2	RMER	76
unc-25	CX16682	2	RMEL	55
unc-25	CX16682	3	RMEV	65
unc-25	CX16682	3	RMED	26
unc-25	CX16682	3	RMER	93
unc-25	CX16682	3	RMEL	84
unc-25	CX16682	3	RIS	147
unc-25	CX16682	3	DD1	197
unc-25	CX16682	3	VD1	120
unc-25	CX16682	3	VD2	143
unc-25	CX16682	4	DD1	127
unc-25	CX16682	4	VD1	159
unc-25	CX16682	4	VD2	177
unc-25	CX16682	4	RIS	272
unc-25	CX16682	4	RMEV	50
unc-25	CX16682	4	RMED	66
unc-25	CX16682	4	RMER	98
unc-25	CX16682	4	RMEL	97
cat-2	CX16682	5	ADEL	72
cat-2	CX16682	5	ADER	75
cat-2	CX16682	5	CEPDL	64
cat-2	CX16682	5	CEPDR	51
cat-2	CX16682	5	CEPVL	50
cat-2	CX16682	5	CEPVR	37
cat-2	CX16682	6	ADEL	49
cat-2	CX16682	6	ADER	52
cat-2	CX16682	6	CEPDL	35
cat-2	CX16682	6	CEPDR	51
cat-2	CX16682	6	CEPVL	39
cat-2	CX16682	6	CEPVR	42
cat-2	CX16682	7	ADER	50
cat-2	CX16682	7	ADEL	49
cat-2	CX16682	7	CEPDL	48
cat-2	CX16682	7	CEPDR	53
cat-2	CX16682	7	CEPVL	76
cat-2	CX16682	7	CEPVR	61
cat-2	CX16682	8	ADER	68
cat-2	CX16682	8	ADEL	49
cat-2	CX16682	8	CEPDL	58
cat-2	CX16682	8	CEPDR	53
cat-2	CX16682	8	CEPVR	63
cat-2	CX16682	8	CEPVL	79
cat-2	CX16682	9	ADEL	64
cat-2	CX16682	9	ADER	47
cat-2	CX16682	9	CEPVL	38
cat-2	CX16682	9	CEPVR	48
cat-2	CX16682	9	CEPDL	48
cat-2	CX16682	9	CEPDR	50
tph-1	CX16682	10	ADFL	14
tph-1	CX16682	10	ADFR	14
tph-1	CX16682	10	NSMR	20
tph-1	CX16682	10	NSML	23
tph-1	CX16682	11	NSML	18
tph-1	CX16682	11	NSMR	31
tph-1	CX16682	12	NSMR	28
tph-1	CX16682	12	NSML	40
tph-1	CX16682	13	NSML	39
tph-1	CX16682	13	NSMR	50

## Sheet: unc-25 neurons
Target	Strain	Animal index	Neuron identity	mRNA count
unc-25	CX16682	2	RMEV	51
unc-25	CX16682	3	RMEV	65
unc-25	CX16682	4	RMEV	50
unc-25	CX16682	2	RMED	54
unc-25	CX16682	3	RMED	26
unc-25	CX16682	4	RMED	66
unc-25	CX16682	2	RMEL	55
unc-25	CX16682	3	RMEL	84
unc-25	CX16682	4	RMEL	97
unc-25	CX16682	2	RMER	76
unc-25	CX16682	3	RMER	93
unc-25	CX16682	4	RMER	98
unc-25	CX16682	1	RIS	146
unc-25	CX16682	3	RIS	147
unc-25	CX16682	4	RIS	272
unc-25	CX16682	1	DD1	130
unc-25	CX16682	3	DD1	197
unc-25	CX16682	4	DD1	127
unc-25	CX16682	1	VD1	96
unc-25	CX16682	3	VD1	120
unc-25	CX16682	4	VD1	159
unc-25	CX16682	1	VD2	61
unc-25	CX16682	3	VD2	143
unc-25	CX16682	4	VD2	177

## Sheet: cat-2 neurons
Target	Strain	Animal index	Neuron identity	mRNA count
cat-2	CX16682	5	CEPVL	50
cat-2	CX16682	6	CEPVL	39
cat-2	CX16682	7	CEPVL	76
cat-2	CX16682	8	CEPVL	79
cat-2	CX16682	9	CEPVL	38
cat-2	CX16682	5	CEPVR	37
cat-2	CX16682	6	CEPVR	42
cat-2	CX16682	7	CEPVR	61
cat-2	CX16682	8	CEPVR	63
cat-2	CX16682	9	CEPVR	48
cat-2	CX16682	5	CEPDL	64
cat-2	CX16682	6	CEPDL	35
cat-2	CX16682	7	CEPDL	48
cat-2	CX16682	8	CEPDL	58
cat-2	CX16682	9	CEPDL	48
cat-2	CX16682	5	CEPDR	51
cat-2	CX16682	6	CEPDR	51
cat-2	CX16682	7	CEPDR	53
cat-2	CX16682	8	CEPDR	53
cat-2	CX16682	9	CEPDR	50
cat-2	CX16682	5	ADEL	72
cat-2	CX16682	6	ADEL	49
cat-2	CX16682	7	ADEL	49
cat-2	CX16682	8	ADEL	49
cat-2	CX16682	9	ADEL	64
cat-2	CX16682	5	ADER	75
cat-2	CX16682	6	ADER	52
cat-2	CX16682	7	ADER	50
cat-2	CX16682	8	ADER	68
cat-2	CX16682	9	ADER	47

## Sheet: tph-1 neurons
Target	Strain	Animal index	Neuron identity	mRNA count
tph-1	CX16682	10	NSML	23
tph-1	CX16682	11	NSML	18
tph-1	CX16682	12	NSML	40
tph-1	CX16682	13	NSML	39
tph-1	CX16682	10	NSMR	20
tph-1	CX16682	11	NSMR	31
tph-1	CX16682	12	NSMR	28
tph-1	CX16682	13	NSMR	50

## Sheet: Statistics
	Transcript	Neuron	Mean	Std Dev.	n (animals)	n (technical replica)
	unc-25	RMEV	55.33	8.39	3	1
		RMED	48.67	20.53	3	1
		RMEL	78.67	21.5	3	1
		RMER	89	11.53	3	1
		RIS	188.33	72.46	3	1
		DD1	151.33	39.58	3	1
		VD1	125	31.8	3	1
		VD2	127	59.63	3	1
	cat-2	CEPVL	56.4	19.85	5	1
		CEPVR	50.2	11.48	5	1
		CEPDL	50.6	11.08	5	1
		CEPDR	51.6	1.34	5	1
		ADEL	56.6	10.78	5	1
		ADER	58.4	12.34	5	1
	tph-1	NSML	30	11.17	4	1
		NSMR	32.25	12.71	4	1
